# Supplementary material for: Knowledge and Attitudes of Cannabidiol in Croatia among Students, Physicians, and Pharmacists
Source: MDPI journal article supplement (doi:10.3390/pharmacy12010002), 2023-12-23
Supplement: s1 [file s1]

# Stavovi i znanja liječnika i ljekarnika o upotrebi medicinskog CBD-a

Poštovani ispitanici, ova anketa je u potpunosti anonimna i provodi se u svrhu znanstvenog istraživanja o stavovima i znanjima o upotrebi medicinskog CBD-a. Posljednjih godina se provodi sve više istraživanja vezanih za upotrebu i dobrobit CBD-a. Na dostupnim medicinskim bazama se gotovo godišnje objavi na stotine znanstvenih istraživanja. Na stranici: [https://pubmed.ncbi.nlm.nih.gov/?term=medical+CBD&filter=date&search.y\\_1](https://pubmed.ncbi.nlm.nih.gov/?term=medical+CBD&filter=date&search.y_1) u kojoj se "medical CBD" koristila kao ključna riječ, uz filter "publication date" od 1 godine, dobiveni su podatci o 650 naslova. To dovoljno govori o važnosti informacija o znanju liječnika i ljekarnika, njihovoj pravovremenoj edukaciji, a sve kako bi se u budućnosti snašli i uspješno donosili važne odluke u eventualnom korištenju medicinskog CBD-a. Istraživači koji sudjeluju u ovom istraživanju su nastavnici Sveučilišta u Splitu, Zagrebu i Osijeku. Nakon završene i obrađene ankete, rezultati će se usporediti s rezultatima sličnih anketa susjednih država. Molimo Vas da anketu ispunite, a nadamo se da Vam nećemo oduzeti puno vremena. Još jednom hvala na sudjelovanju.

Istraživači

---

\* Indicates required question

1. 1. Spol? \*

*Mark only one oval.*

☐ Ž

☐ M

## 2. 2. Odaberite pripadajuće zanimanje \*

*Mark only one oval.*

- ☐ Liječnik opće prakse
- ☐ Liječnik specijalist
- ☐ Ljekarnik
- ☐ Ljekarnik specijalist

## 3. 3. Navedite koju specijalizaciju posjedujete (za ispitanike sa specijalizacijom)?

---

## 4. 4. Koliko dugo godina radite u praksi? \*

*Mark only one oval.*

- ☐ 1-5
- ☐ 6-10
- ☐ 10-20
- ☐ 20-30
- ☐ 30-40
- ☐ više od 40

## 5. 5. Imate li saznanja o CBD-u? \*

*Mark only one oval.*

- ☐ da
- ☐ ne

6. 6. Jeste li ikada konzumirali CBD? \*

*Mark only one oval.*

☐ da

☐ ne

7. 7. Mislite li da je CBD štetan za zdravlje? \*

*Mark only one oval.*

1   2   3   4   5

u po ☐ ☐ ☐ ☐ ☐ u potpunosti se slažem

8. 8. Mislite li da je primjena CBD-a u liječenju učinkovita? \*

*Mark only one oval.*

1   2   3   4   5

u po ☐ ☐ ☐ ☐ ☐ u potpunosti se slažem

9. 9. Kroz svoje formalno obrazovanje imao/imala sam edukaciju o korištenju CBD-a u medicinske svrhe. \*

*Mark only one oval.*

☐ da

☐ ne

10. 10. Smatram da mi treba dodatna edukacija o korištenju CBD-a u medicinske svrhe. \*

*Mark only one oval.*

1 2 3 4 5

u po ☐ ☐ ☐ ☐ ☐ u potpunosti se slažem

11. 11. Upoznat/a sam s rizicima korištenja CBD-a. \*

*Mark only one oval.*

1 2 3 4 5

u po ☐ ☐ ☐ ☐ ☐ u potpunosti se slažem

12. 12. Upoznat/a sam s dobrobitima korištenja CBD-a. \*

*Mark only one oval.*

1 2 3 4 5

u po ☐ ☐ ☐ ☐ ☐ u potpunosti se slažem

13. 13. Korištenje CBD-a ima pozitivne učinke na tjelesno zdravlje. \*

*Mark only one oval.*

1 2 3 4 5

u po ☐ ☐ ☐ ☐ ☐ u potpunosti se slažem

14. 14. Korištenje CBD-a ima pozitivne učinke na mentalno zdravlje. \*

*Mark only one oval.*

|       |                       |                       |                       |                       |                       |                        |
|-------|-----------------------|-----------------------|-----------------------|-----------------------|-----------------------|------------------------|
|       | 1                     | 2                     | 3                     | 4                     | 5                     |                        |
| <hr/> |                       |                       |                       |                       |                       |                        |
| u po  | <input type="radio"/> | u potpunosti se slažem |
| <hr/> |                       |                       |                       |                       |                       |                        |

15. 15. CBD pomaže pacijentima s kronično iscrpljujućim stanjima. \*

*Mark only one oval.*

|       |                       |                       |                       |                       |                       |                        |
|-------|-----------------------|-----------------------|-----------------------|-----------------------|-----------------------|------------------------|
|       | 1                     | 2                     | 3                     | 4                     | 5                     |                        |
| <hr/> |                       |                       |                       |                       |                       |                        |
| u po  | <input type="radio"/> | u potpunosti se slažem |
| <hr/> |                       |                       |                       |                       |                       |                        |

16. 16. Korištenje CBD-a izaziva tjelesnu ovisnost. \*

*Mark only one oval.*

|       |                       |                       |                       |                       |                       |                        |
|-------|-----------------------|-----------------------|-----------------------|-----------------------|-----------------------|------------------------|
|       | 1                     | 2                     | 3                     | 4                     | 5                     |                        |
| <hr/> |                       |                       |                       |                       |                       |                        |
| u po  | <input type="radio"/> | u potpunosti se slažem |
| <hr/> |                       |                       |                       |                       |                       |                        |

17. 17. Korištenje CBD-a izaziva psihičku ovisnost. \*

*Mark only one oval.*

|       |                       |                       |                       |                       |                       |                        |
|-------|-----------------------|-----------------------|-----------------------|-----------------------|-----------------------|------------------------|
|       | 1                     | 2                     | 3                     | 4                     | 5                     |                        |
| <hr/> |                       |                       |                       |                       |                       |                        |
| u po  | <input type="radio"/> | u potpunosti se slažem |
| <hr/> |                       |                       |                       |                       |                       |                        |

18. 18. Korištenje CBD-a može dovesti do ovisnosti o drugim opioidima i drogama. \*

*Mark only one oval.*

1 2 3 4 5

u po ☐ ☐ ☐ ☐ ☐ u potpunosti se slažem

19. 19. CBD izaziva osjećaj euforije. \*

*Mark only one oval.*

1 2 3 4 5

u po ☐ ☐ ☐ ☐ ☐ u potpunosti se slažem

20. 20. Prema Vašim saznanjima što mislite za koje indikacije je FDA (Food and drug administration) odobrila lijekove s CBD-om? \*

*Check all that apply.*

- ☐ Mučnina povezana s kemoterapijom
- ☐ Kronična neuropatska bol
- ☐ EPI napadi kod Lennox- Gastaut i Dravet sindroma
- ☐ Depresivni poremećaji
- ☐ Parkinsonova bolest
- ☐ Tuberozna skleroza
- ☐ Bolovi kod malignih oboljenja

21. 21. Prema Vašim saznanjima koje neželjene učinke uzrokuje CBD? \*

*Check all that apply.*

- ☐ Anemija
- ☐ Tahikardija
- ☐ Proljev i povraćanje
- ☐ Glaukom
- ☐ Smanjen tek
- ☐ Hiperglikemija
- ☐ Somnolencija

22. 22. Prema Vašim saznanjima koji lijekovi imaju umjerene ili velike interakcije s CBD-om? \*

*Check all that apply.*

- ☐ Paracetamol
- ☐ Valproat
- ☐ Omeprazol
- ☐ Karbamazepin
- ☐ Ibuprofen
- ☐ Rifampicin
- ☐ Amoksicilin
- ☐ Everolimus
- ☐ Klobazam
- ☐ Fenhidramin

23. 23. Prema Vašim saznanjima kod kojih stanja je potreban oprez pri upotrebi CBD-a? \*

*Check all that apply.*

- ☐ Srčana aritmija
- ☐ Hepatocelularno oštećenje
- ☐ Glaukom
- ☐ Somnolencija
- ☐ Karcinom
- ☐ Smanjena tjelesna težina
- ☐ Trudnoća
- ☐ Suicidalno ponašanje
- ☐ Somnolencija i sedacija

24. 24. Podupirem korištenje CBD-a kod: \*

*Check all that apply.*

- ☐ Palijativnih bolesnika
- ☐ Ublažavanje boli kod oboljelih od karcinoma
- ☐ Nuspojava kemoterapije
- ☐ Multiple skleroze
- ☐ Neuropatske boli
- ☐ Kronične boli
- ☐ PTSP
- ☐ Nesanice
- ☐ Kronove bolesti
- ☐ Glaukoma
- ☐ Hepatitisa C
- ☐ Mišićne spastičnosti
- ☐ HIV-a
- ☐ Traumatske ozlijede mozga
- ☐ ALS-a
- ☐ Alzheimerove bolesti
- ☐ Anoreksije
- ☐ Parkinsonove bolesti
- ☐ Migrene



25. 25. Smatram kako bi preporučivanje/prepisivanje CBD-a moglo smanjiti upotrebu opioda kod kronične boli. \*

*Mark only one oval.*

☐ DA

☐ NE

26. 26. Smatram da imam dovoljno znanja o korištenju CBD-a u medicinske svrhe te da ga mogu preporučiti pacijentima. \*

*Mark only one oval.*

☐ DA

☐ NE

27. 27. Jeste li do sada u svojoj praksi pacijentima preporučili/prepisali korištenje CBD-a? \*

*Mark only one oval.*

☐ NE

☐ Da, samo jednom

☐ Da, više puta

☐ Da, često pacijentima specifičnih dijagnoza

28. 28. Smatram da bi zdravstveno osiguranje trebalo pokrivati troškove CBD-a ukoliko ga liječnik prepíše kao terapiju. \*

*Mark only one oval.*

☐ DA

☐ NE

29. Jeste li ikada pročitali neki znanstveno-stručni rad o CBD-u?

*Mark only one oval.*

☐ DA

☐ Ne

30. 30. Obrazovni kurikulumi liječnika, zdravstvenih djelatnika i farmaceuta trebali bi sadržavati predmete o upotrebi CBD-a u medicinske svrhe. \*

*Mark only one oval.*

1    2    3    4    5

u po ☐ ☐ ☐ ☐ ☐ u potpunosti se slažem

31. 31. U kojoj županiji živite? \*

*Mark only one oval.*

- ☐ Bjelovarsko-bilogorska
- ☐ Brodsko-posavska
- ☐ Dubovačko-neretvanska
- ☐ Istarska
- ☐ Karlovačka
- ☐ Koprivničko-križevačka
- ☐ Krapinsko-zagorska
- ☐ Ličko-senjska
- ☐ Međimurska
- ☐ Osječko-baranjska
- ☐ Požeško-slavonska
- ☐ Primorsko-goranska
- ☐ Sisačko-moslavačka
- ☐ Splitsko-dalmatinska
- ☐ Šibensko-kninska
- ☐ Varaždinska
- ☐ Virovitičko-podravska
- ☐ Vukovarsko-srijemska
- ☐ Zadarska
- ☐ Zagrebačka
- ☐ Grad Zagreb

### Anketa

Zahvaljujemo Vam na sudjelovanju u ovoj anketi. Svojim odgovorima doprinijeli ste boljem razumijevanju trenutnog stanja o znanjima i stavovima upotrebe medicinskog CBD-a te potrebom za eventualnm dodatnim edukacijama.

Istraživači

---

This content is neither created nor endorsed by Google.

Google Forms
