# Supplementary material for: Knowledge and Attitudes of Cannabidiol in Croatia among Students, Physicians, and Pharmacists
Source: MDPI journal article supplement (doi:10.3390/pharmacy12010002), 2023-12-23
Supplement: s1 [file s1]

# Stavovi i znanja studenata o upotrebi medicinskog CBD-a

Poštovani ispitanici, ova anketa je u potpunosti anonimna i provodi se u svrhu znanstvenog istraživanja o stavovima i znanjima o upotrebi medicinskog CBD-a. Posljednjih godina se provodi sve više istraživanja vezanih za upotrebu i dobrobit CBD-a. Na dostupnim medicinskim bazama se gotovo godišnje objavi na stotine znanstvenih istraživanja. Na stranici: [https://pubmed.ncbi.nlm.nih.gov/?term=medical+CBD&filter=date&search.y\\_1](https://pubmed.ncbi.nlm.nih.gov/?term=medical+CBD&filter=date&search.y_1) u kojoj se "medical CBD" koristila kao ključna riječ, uz filter "publication date" od 1 godine, dobiveni su podatci o 650 naslova. To dovoljno govori o važnosti informacija o znanju studenata zdravstvenih struka, njihovoj pravovremenoj edukaciji, a sve kako bi se u budućnosti snašli i uspješno donosili važne odluke u eventualnom korištenju medicinskog CBD-a. Istraživači koji sudjeluju u ovom istraživanju su nastavnici Sveučilišta u Splitu, Zagrebu i Osijeku. Nakon završene i obrađene ankete, rezultati će se usporediti s rezultatima sličnih anketa susjednih država. Molimo Vas da anketu ispunite, a nadamo se da Vam nećemo oduzeti puno vremena. Još jednom hvala na sudjelovanju.

Istraživači

---

\* Indicates required question

1. 1. Spol? \*

*Mark only one oval.*

☐ Ž

☐ M

## 2. 2. Koji studijski program- fakultet pohađate? \*

*Mark only one oval.*

- ☐ Studij medicine - Medicinski fakultet Split
- ☐ Studij farmacije - Medicinski fakultet Split
- ☐ Farmaceutsko-biokemijski fakultet Sveučilišta u Zagrebu
- ☐ Medicinski fakultet Sveučilišta u Osijeku
- ☐ Sveučilišni odjel zdravstvenih studija Sveučilišta u Splitu (preddiplomski studiji)
- ☐ Sveučilišni odjel zdravstvenih studija Sveučilišta u Splitu (diplomski studiji)

## 3. 3. Godina studija? \*

*Mark only one oval.*

- ☐ 1
- ☐ 2
- ☐ 3
- ☐ 4
- ☐ 5
- ☐ 6

## 4. 4. Imate li saznanja o CBD-u? \*

*Mark only one oval.*

- ☐ da
- ☐ ne

5. 5. Jeste li ikada konzumirali CBD? \*

*Mark only one oval.*

☐ da

☐ ne

6. 6. Mislite li da je CBD štetan za zdravlje? \*

*Mark only one oval.*

1   2   3   4   5

u po ☐ ☐ ☐ ☐ ☐ u potpunosti se slažem

7. 7. Mislite li da je primjena CBD-a u liječenju učinkovita? \*

*Mark only one oval.*

1   2   3   4   5

u po ☐ ☐ ☐ ☐ ☐ u potpunosti se slažem

8. 8. Kroz svoje formalno obrazovanje imao/imala sam edukaciju o korištenju CBD-a u medicinske svrhe. \*

*Mark only one oval.*

☐ da

☐ ne

9. 9. Smatram da mi treba dodatna edukacija o korištenju CBD-a u medicinske svrhe. \*

*Mark only one oval.*

1 2 3 4 5

u po ☐ ☐ ☐ ☐ ☐ u potpunosti se slažem

10. 10. Upoznat/a sam s rizicima korištenja CBD-a. \*

*Mark only one oval.*

1 2 3 4 5

u po ☐ ☐ ☐ ☐ ☐ u potpunosti se slažem

11. 11. Upoznat/a sam s dobrobitima korištenja CBD-a. \*

*Mark only one oval.*

1 2 3 4 5

u po ☐ ☐ ☐ ☐ ☐ u potpunosti se slažem

12. 12. Korištenje CBD-a ima pozitivne učinke na tjelesno zdravlje. \*

*Mark only one oval.*

1 2 3 4 5

u po ☐ ☐ ☐ ☐ ☐ u potpunosti se slažem

13. 13. Korištenje CBD-a ima pozitivne učinke na mentalno zdravlje. \*

*Mark only one oval.*

|       |                       |                       |                       |                       |                       |                        |
|-------|-----------------------|-----------------------|-----------------------|-----------------------|-----------------------|------------------------|
|       | 1                     | 2                     | 3                     | 4                     | 5                     |                        |
| <hr/> |                       |                       |                       |                       |                       |                        |
| u po  | <input type="radio"/> | u potpunosti se slažem |
| <hr/> |                       |                       |                       |                       |                       |                        |

14. 14. CBD pomaže pacijentima s kronično iscrpljujućim stanjima. \*

*Mark only one oval.*

|       |                       |                       |                       |                       |                       |                        |
|-------|-----------------------|-----------------------|-----------------------|-----------------------|-----------------------|------------------------|
|       | 1                     | 2                     | 3                     | 4                     | 5                     |                        |
| <hr/> |                       |                       |                       |                       |                       |                        |
| u po  | <input type="radio"/> | u potpunosti se slažem |
| <hr/> |                       |                       |                       |                       |                       |                        |

15. 15. Korištenje CBD-a izaziva tjelesnu ovisnost. \*

*Mark only one oval.*

|       |                       |                       |                       |                       |                       |                        |
|-------|-----------------------|-----------------------|-----------------------|-----------------------|-----------------------|------------------------|
|       | 1                     | 2                     | 3                     | 4                     | 5                     |                        |
| <hr/> |                       |                       |                       |                       |                       |                        |
| u po  | <input type="radio"/> | u potpunosti se slažem |
| <hr/> |                       |                       |                       |                       |                       |                        |

16. 16. Korištenje CBD-a izaziva psihičku ovisnost. \*

*Mark only one oval.*

|       |                       |                       |                       |                       |                       |                        |
|-------|-----------------------|-----------------------|-----------------------|-----------------------|-----------------------|------------------------|
|       | 1                     | 2                     | 3                     | 4                     | 5                     |                        |
| <hr/> |                       |                       |                       |                       |                       |                        |
| u po  | <input type="radio"/> | u potpunosti se slažem |
| <hr/> |                       |                       |                       |                       |                       |                        |

17. 17. Korištenje CBD-a može dovesti do ovisnosti o drugim opiodima i drogama. \*

Mark only one oval.

1 2 3 4 5

u po ☐ ☐ ☐ ☐ ☐ u potpunosti se slažem

18. 18. CBD izaziva osjećaj euforije. \*

Mark only one oval.

1 2 3 4 5

u po ☐ ☐ ☐ ☐ ☐ u potpunosti se slažem

19. 19. Jeste li ikada pročitali neki znanstveno-stručni rad o CBD-u? \*

Mark only one oval.

☐ DA

☐ Ne

20. 20. Obrazovni kurikulumi liječnika, zdravstvenih djelatnika i farmaceuta trebali bi sadržavati predmete o upotrebi CBD-a u medicinske svrhe. \*

Mark only one oval.

1 2 3 4 5

u po ☐ ☐ ☐ ☐ ☐ u potpunosti se slažem

## Anketa

Zahvaljujemo Vam na sudjelovanju u ovoj anketi. Svojim odgovorima doprinijeli ste boljem razumijevanju trenutnog stanja o

znanjima i stavovima upotrebe medicinskog CBD-a te potrebom za eventualnm dodatnim edukacijama.

Istraživači

---

This content is neither created nor endorsed by Google.

Google Forms
